# Supplementary material for: Diversifying Selection on Flavanone 3-Hydroxylase and Isoflavone Synthase Genes in Cultivated Soybean and Its Wild Progenitors
Source: PubMed Central journal article supplement (PMC3546919; doi:10.1371/journal.pone.0054154), 2013-01-16
Supplement: pone.0054154.s003.pdf [file pone.0054154.s003.pdf]

Figure S3.

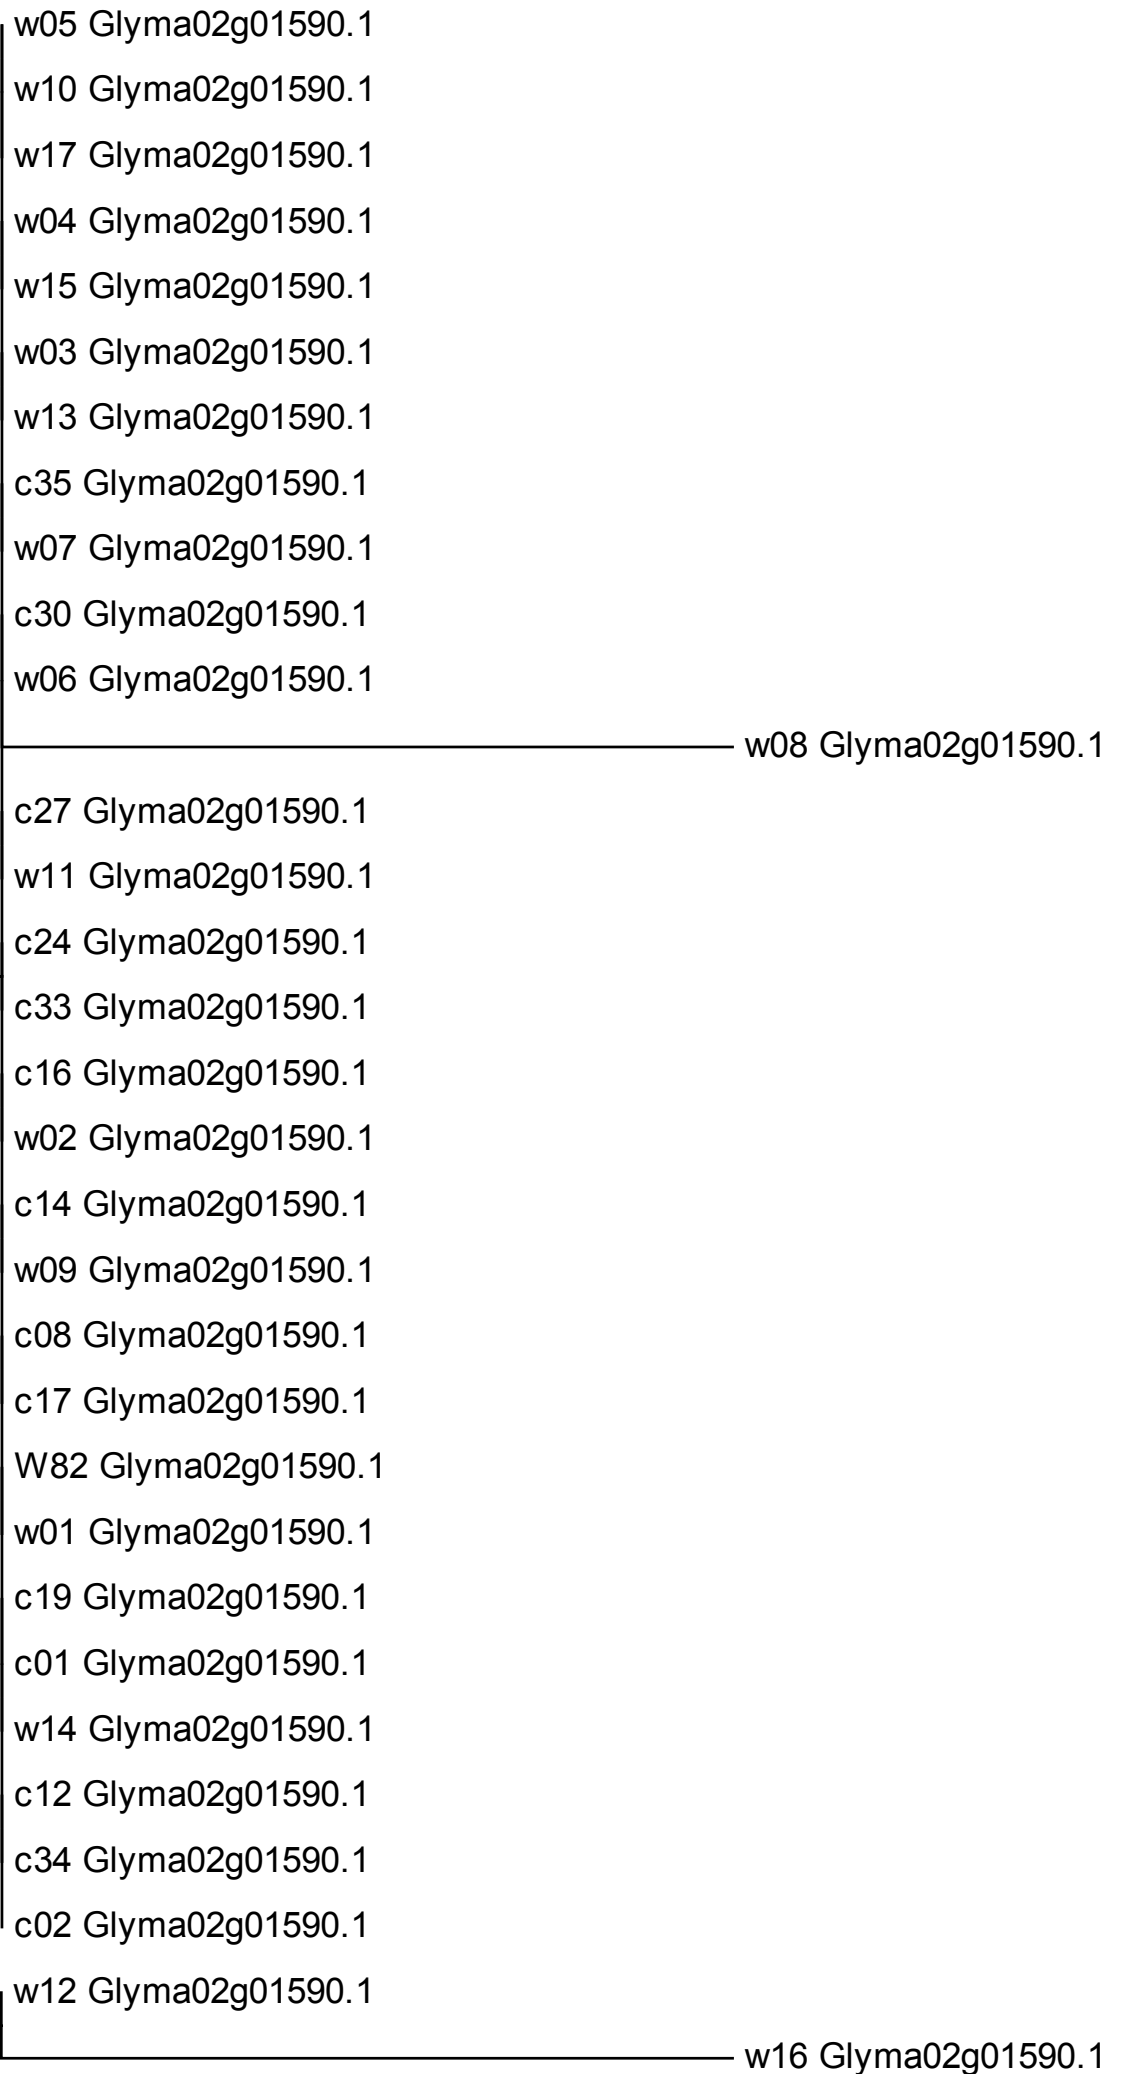

0.0001

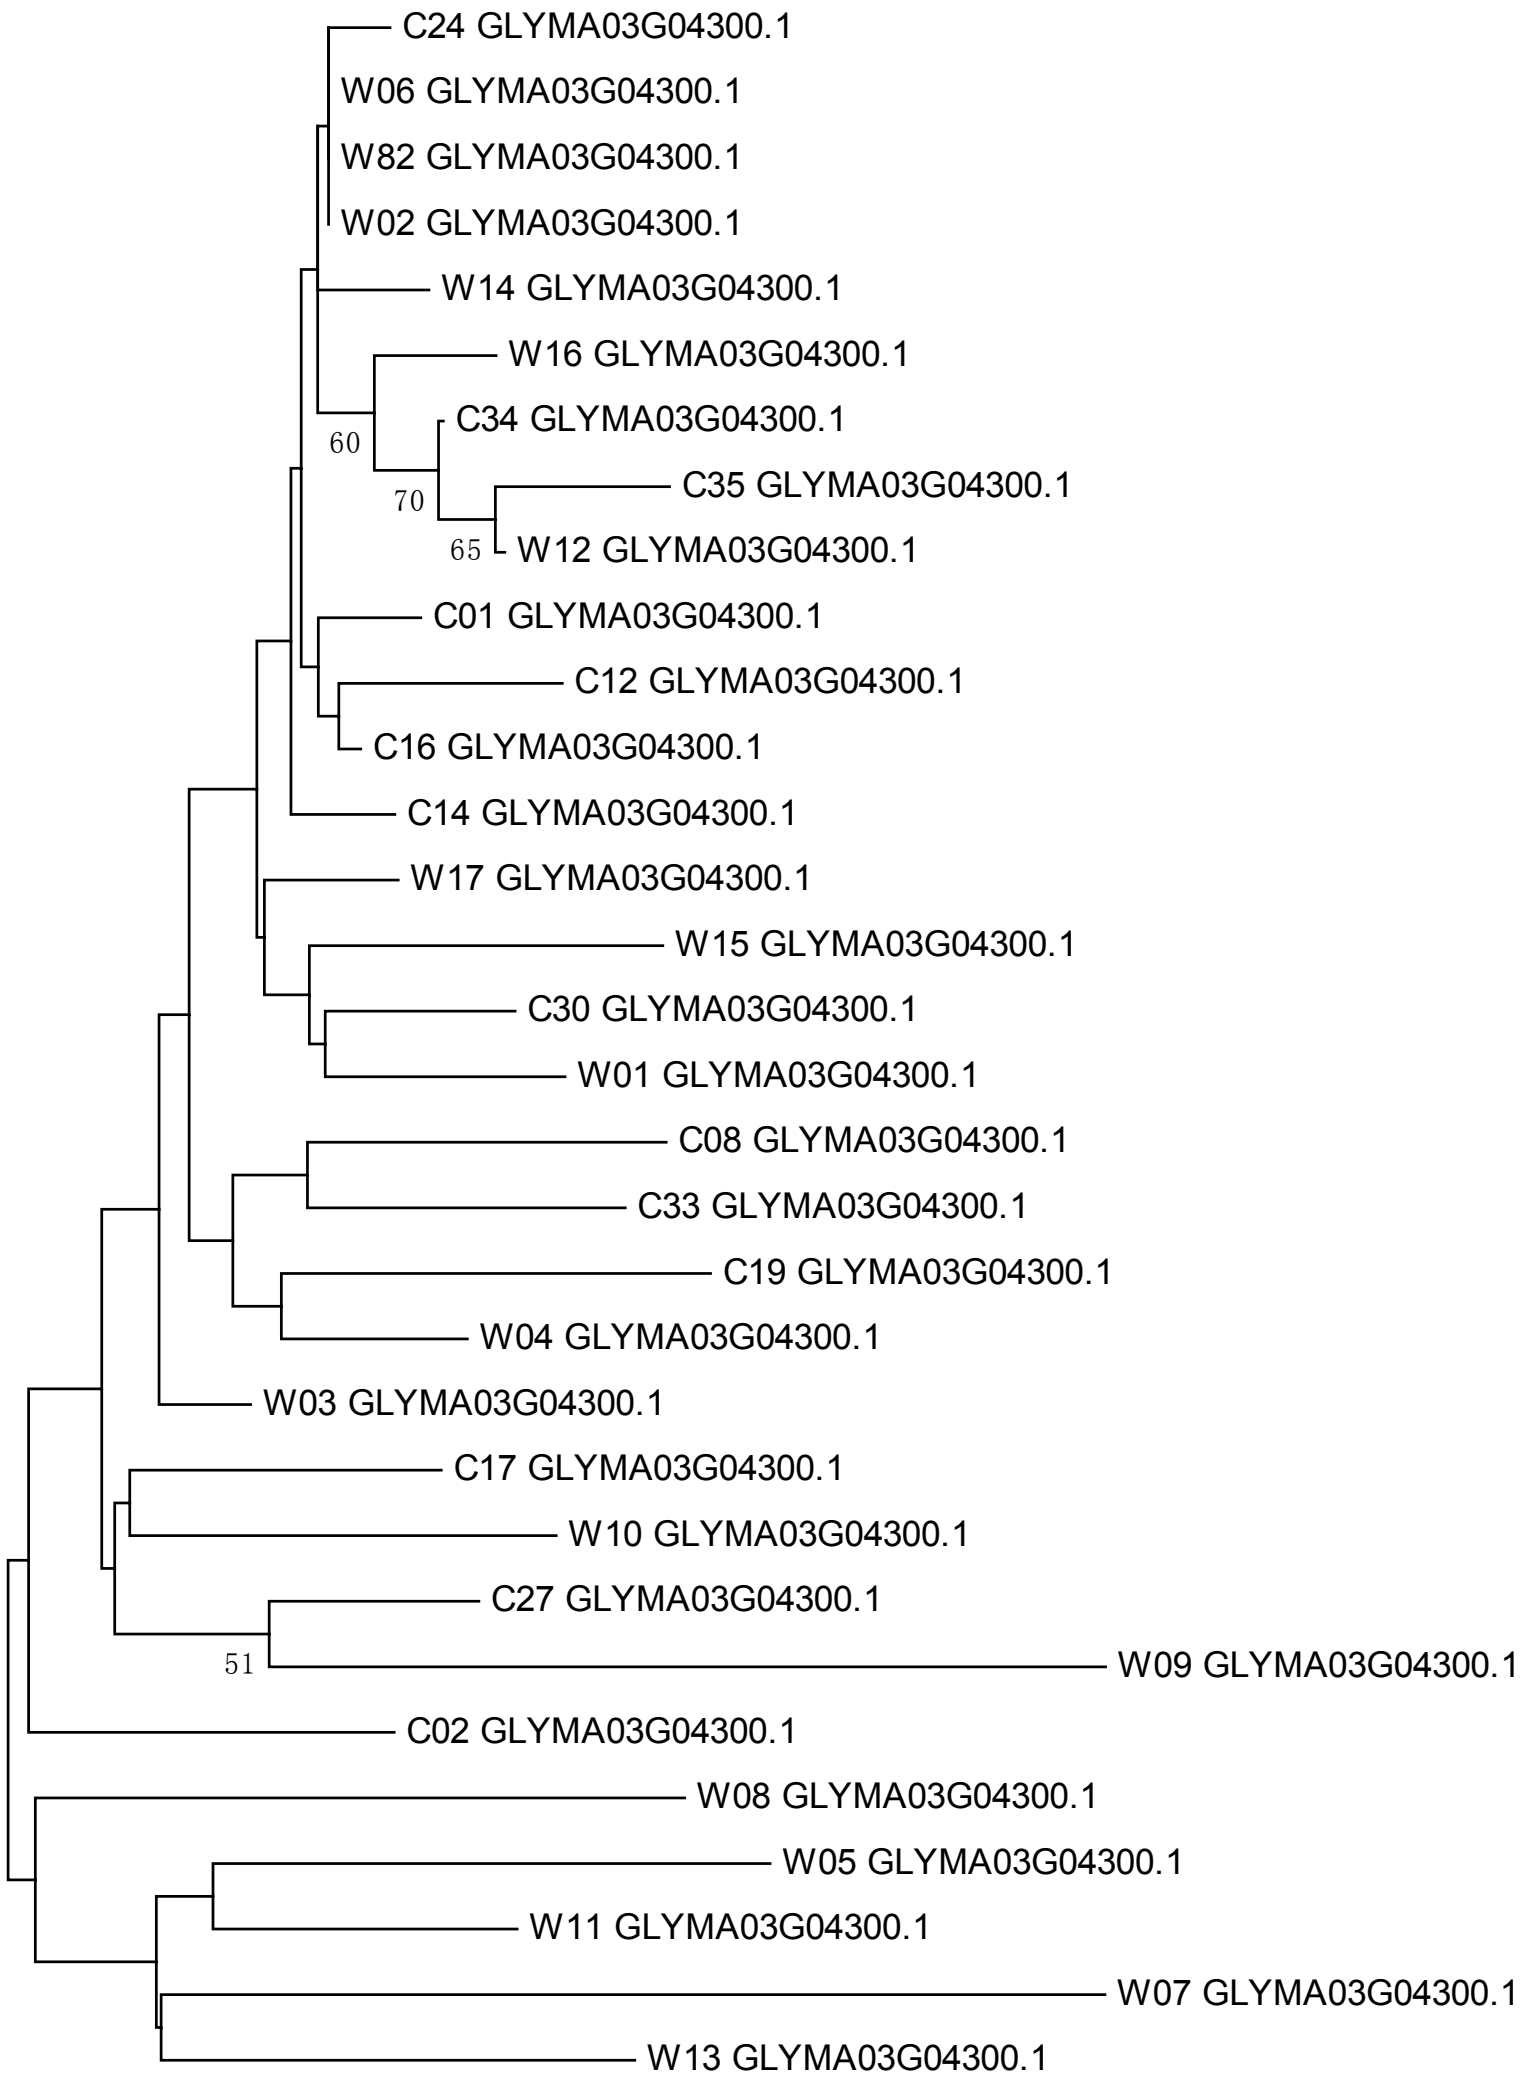

H  
0.0001

W13 GLYMA04G14800.1  
W16 GLYMA04G14800.1  
W17 GLYMA04G14800.1  
W05 GLYMA04G14800.1  
W06 GLYMA04G14800.1  
C35 GLYMA04G14800.1  
W02 GLYMA04G14800.1  
C33 GLYMA04G14800.1  
W08 GLYMA04G14800.1  
C19 GLYMA04G14800.1  
W04 GLYMA04G14800.1  
C17 GLYMA04G14800.1  
W03 GLYMA04G14800.1  
C24 GLYMA04G14800.1  
W01 GLYMA04G14800.1  
C16 GLYMA04G14800.1  
W15 GLYMA04G14800.1  
C12 GLYMA04G14800.1  
C34 GLYMA04G14800.1  
C30 GLYMA04G14800.1  
W14 GLYMA04G14800.1  
W12 GLYMA04G14800.1  
C08 GLYMA04G14800.1  
W11 GLYMA04G14800.1  
C02 GLYMA04G14800.1  
W10 GLYMA04G14800.1  
W82 GLYMA04G14800.1  
C14 GLYMA04G14800.1  
C27 GLYMA04G14800.1  
W09 GLYMA04G14800.1  
C01 GLYMA04G14800.1  
W07 GLYMA04G14800.1

0.0001

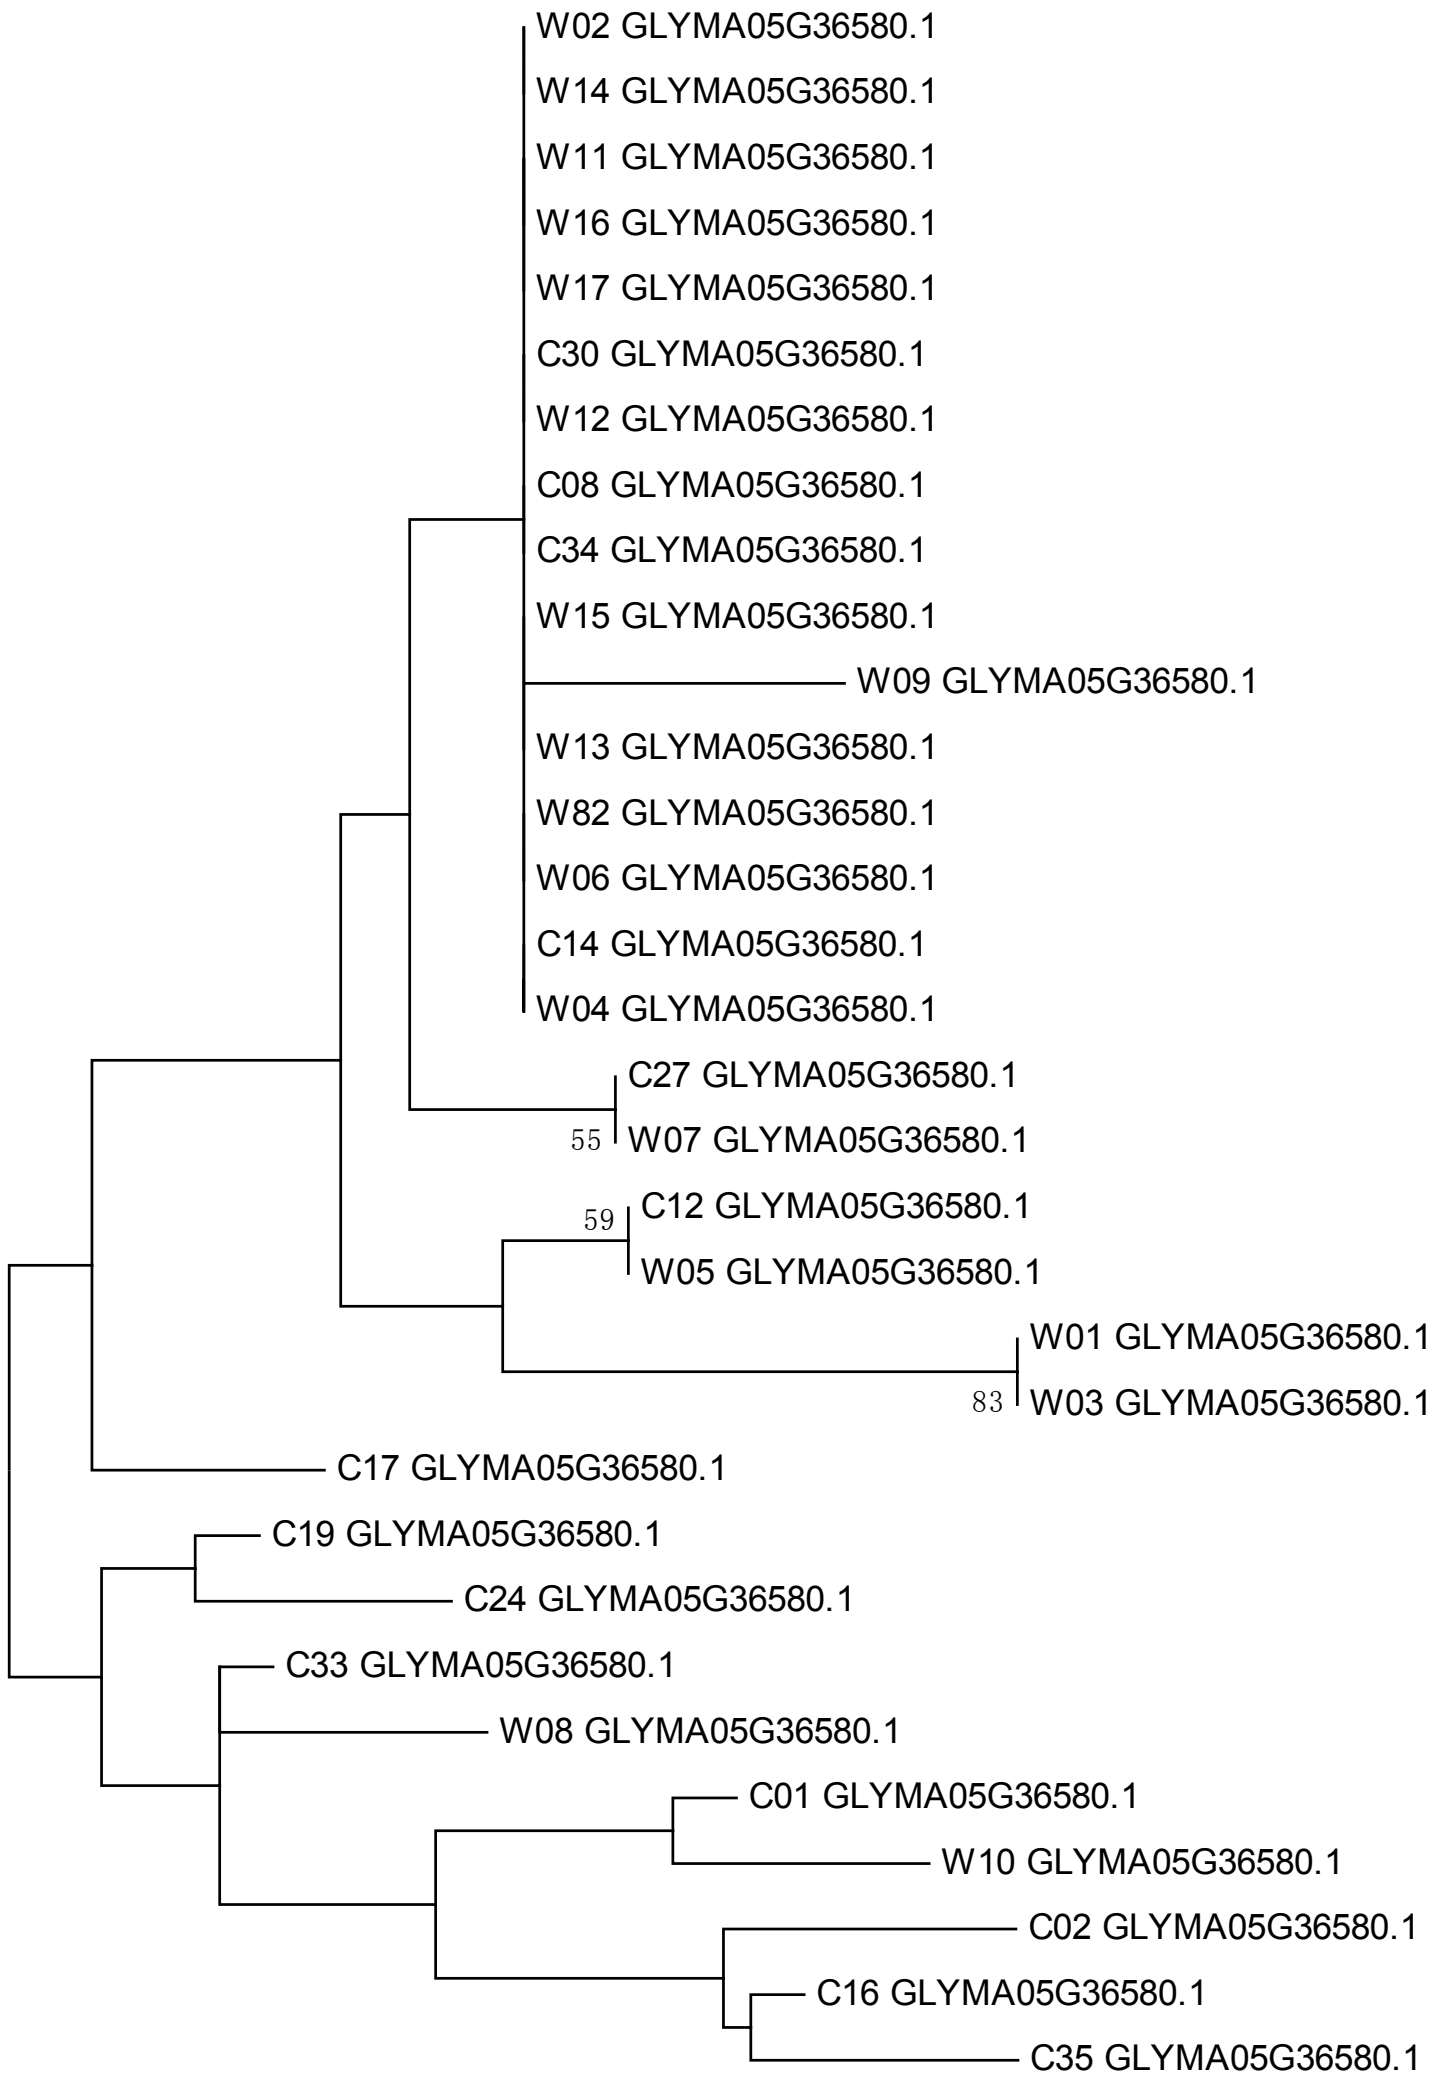

0.0001

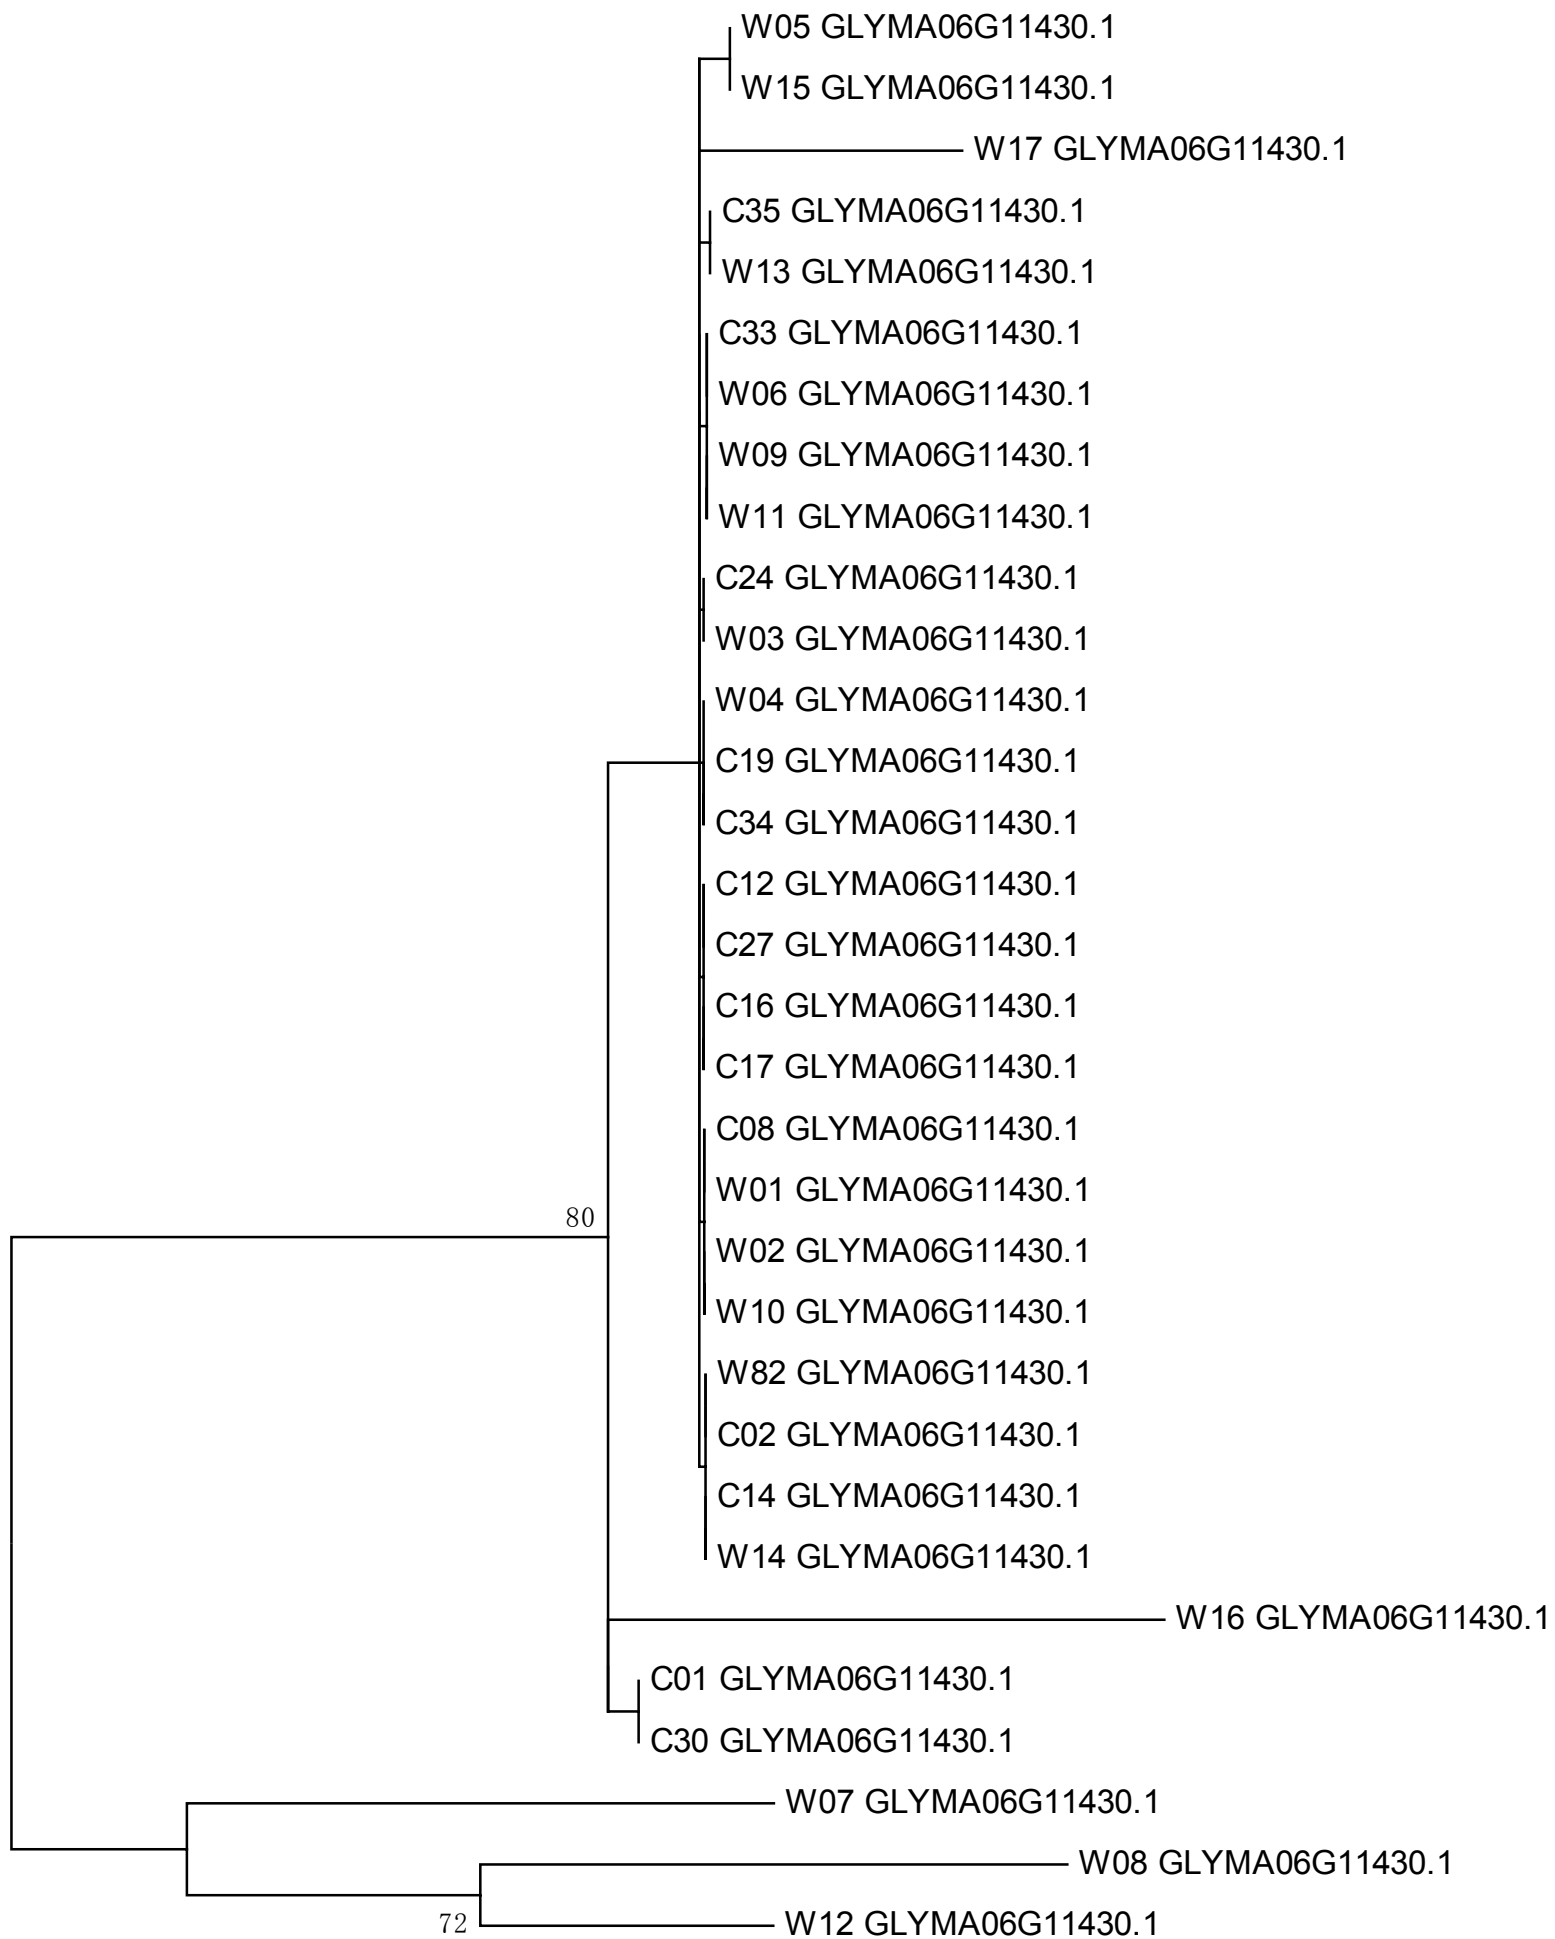

0.0001

W HC06  
W HC15  
W HC23  
W HC05  
W HC18  
W HC02  
W HC14  
W HC12  
W HC22  
W05 GLYMA07G32330.  
W06 GLYMA07G32330.  
W02 GLYMA07G32330.  
W11 GLYMA07G32330.  
W01 GLYMA07G32330.  
W HC20  
C HC37  
W04 GLYMA07G32330.  
C HC33  
W15 GLYMA07G32330.  
C HC32  
W HC09  
C HC31  
W12 GLYMA07G32330.  
C HC25  
C HC35  
C HC07  
W17 GLYMA07G32330.  
C HC01  
C HC27  
W03 GLYMA07G32330.  
W HC03  
W HC08  
C35 GLYMA07G32330.  
CW82 GLYMA07G32330  
C34 GLYMA07G32330.  
W09 GLYMA07G32330.  
W14 GLYMA07G32330.  
W HC10  
C33 GLYMA07G32330.  
C HC29  
C27 GLYMA07G32330.  
C HC11  
C14 GLYMA07G32330.  
W13 GLYMA07G32330.  
C12 GLYMA07G32330.  
C24 GLYMA07G32330.  
C01 GLYMA07G32330.  
W16 GLYMA07G32330.  
C08 GLYMA07G32330.  
C02 GLYMA07G32330.  
W HC19  
C HC21  
W08 GLYMA07G32330.  
C HC28  
W07 GLYMA07G32330.

65

C HC16  
C17 GLYMA07G32330.  
C HC26  
C HC04  
W HC17  
C HC24  
W10 GLYMA07G32330.  
C19 GLYMA07G32330.  
C30 GLYMA07G32330.  
C16 GLYMA07G32330.

W16 GLYMA08G07350.1  
W17 GLYMA08G07350.1  
W15 GLYMA08G07350.1  
W14 GLYMA08G07350.1  
W13 GLYMA08G07350.1  
W12 GLYMA08G07350.1  
W11 GLYMA08G07350.1  
W10 GLYMA08G07350.1  
64 W09 GLYMA08G07350.1  
W08 GLYMA08G07350.1  
W07 GLYMA08G07350.1  
C12 GLYMA08G07350.1  
C33 GLYMA08G07350.1  
W01 GLYMA08G07350.1  
W03 GLYMA08G07350.1  
W04 GLYMA08G07350.1  
W05 GLYMA08G07350.1  
W82 GLYMA08G07350.1  
C01 GLYMA08G07350.1  
C02 GLYMA08G07350.1  
C08 GLYMA08G07350.1  
C14 GLYMA08G07350.1  
C16 GLYMA08G07350.1  
C17 GLYMA08G07350.1  
C19 GLYMA08G07350.1  
C24 GLYMA08G07350.1  
C27 GLYMA08G07350.1  
C30 GLYMA08G07350.1  
C34 GLYMA08G07350.1  
C35 GLYMA08G07350.1  
W02 GLYMA08G07350.1  
W06 GLYMA08G07350.1

W10 GLYMA09G31740.  
W HC18  
W08 GLYMA09G31740.  
W05 GLYMA09G31740.  
C HC35  
C HC31  
C HC28  
C HC26  
C HC24  
C HC16  
C HC11  
C HC07  
C HC01  
C35 GLYMA09G31740.  
C34 GLYMA09G31740.  
C33 GLYMA09G31740.  
C27 GLYMA09G31740.  
C24 GLYMA09G31740.  
C16 GLYMA09G31740.  
C14 GLYMA09G31740.

63

W HC22  
W HC20  
W HC19  
W HC17  
W HC15  
W HC14  
W HC10  
W HC08  
W HC05  
W HC03  
W HC02  
W17 GLYMA09G31740.  
W16 GLYMA09G31740.  
W15 GLYMA09G31740.  
W14 GLYMA09G31740.  
W13 GLYMA09G31740.  
W12 GLYMA09G31740.  
W11 GLYMA09G31740.  
W09 GLYMA09G31740.  
W07 GLYMA09G31740.  
W06 GLYMA09G31740.  
W04 GLYMA09G31740.  
W03 GLYMA09G31740.  
W02 GLYMA09G31740.  
C08 GLYMA09G31740.  
C01 GLYMA09G31740.  
C02 GLYMA09G31740.  
C12 GLYMA09G31740.  
C17 GLYMA09G31740.  
C19 GLYMA09G31740.  
C30 GLYMA09G31740.  
CW82 GLYMA09G31740  
C HC04  
C HC21  
C HC25  
C HC27  
C HC29  
C HC32  
C HC33  
C HC37  
W01 GLYMA09G31740.  
W HC12

64

W HC06  
W HC09  
W HC23

68



W HC20  
W HC22  
W HC19  
W HC15  
W HC14  
W HC10  
W HC09  
W HC03

64

W13 GLYMA10G04280.  
W12 GLYMA10G04280.  
W10 GLYMA10G04280.  
W08 GLYMA10G04280.  
W07 GLYMA10G04280.  
W05 GLYMA10G04280.  
W02 GLYMA10G04280.

W06 GLYMA10G04280.  
C HC37  
C HC35  
C HC33  
C HC32  
C HC31  
C HC29  
C HC28  
C HC26  
C HC25  
C HC24  
C HC16  
C HC11  
C HC07  
C HC04  
CW82 GLYMA10G04280  
C34 GLYMA10G04280.  
C30 GLYMA10G04280.  
C24 GLYMA10G04280.  
C17 GLYMA10G04280.  
C14 GLYMA10G04280.  
C08 GLYMA10G04280.  
C01 GLYMA10G04280.  
C02 GLYMA10G04280.  
C12 GLYMA10G04280.  
C16 GLYMA10G04280.  
C19 GLYMA10G04280.  
C27 GLYMA10G04280.  
C33 GLYMA10G04280.  
C35 GLYMA10G04280.  
W09 GLYMA10G04280.  
W11 GLYMA10G04280.  
W14 GLYMA10G04280.  
W16 GLYMA10G04280.  
W17 GLYMA10G04280.  
W HC02  
W HC06  
W HC17  
W HC18

C HC01  
C HC21  
C HC27  
W01 GLYMA10G04280.  
W03 GLYMA10G04280.  
W04 GLYMA10G04280.  
W15 GLYMA10G04280.  
W HC05  
W HC08  
W HC12  
W HC23

62

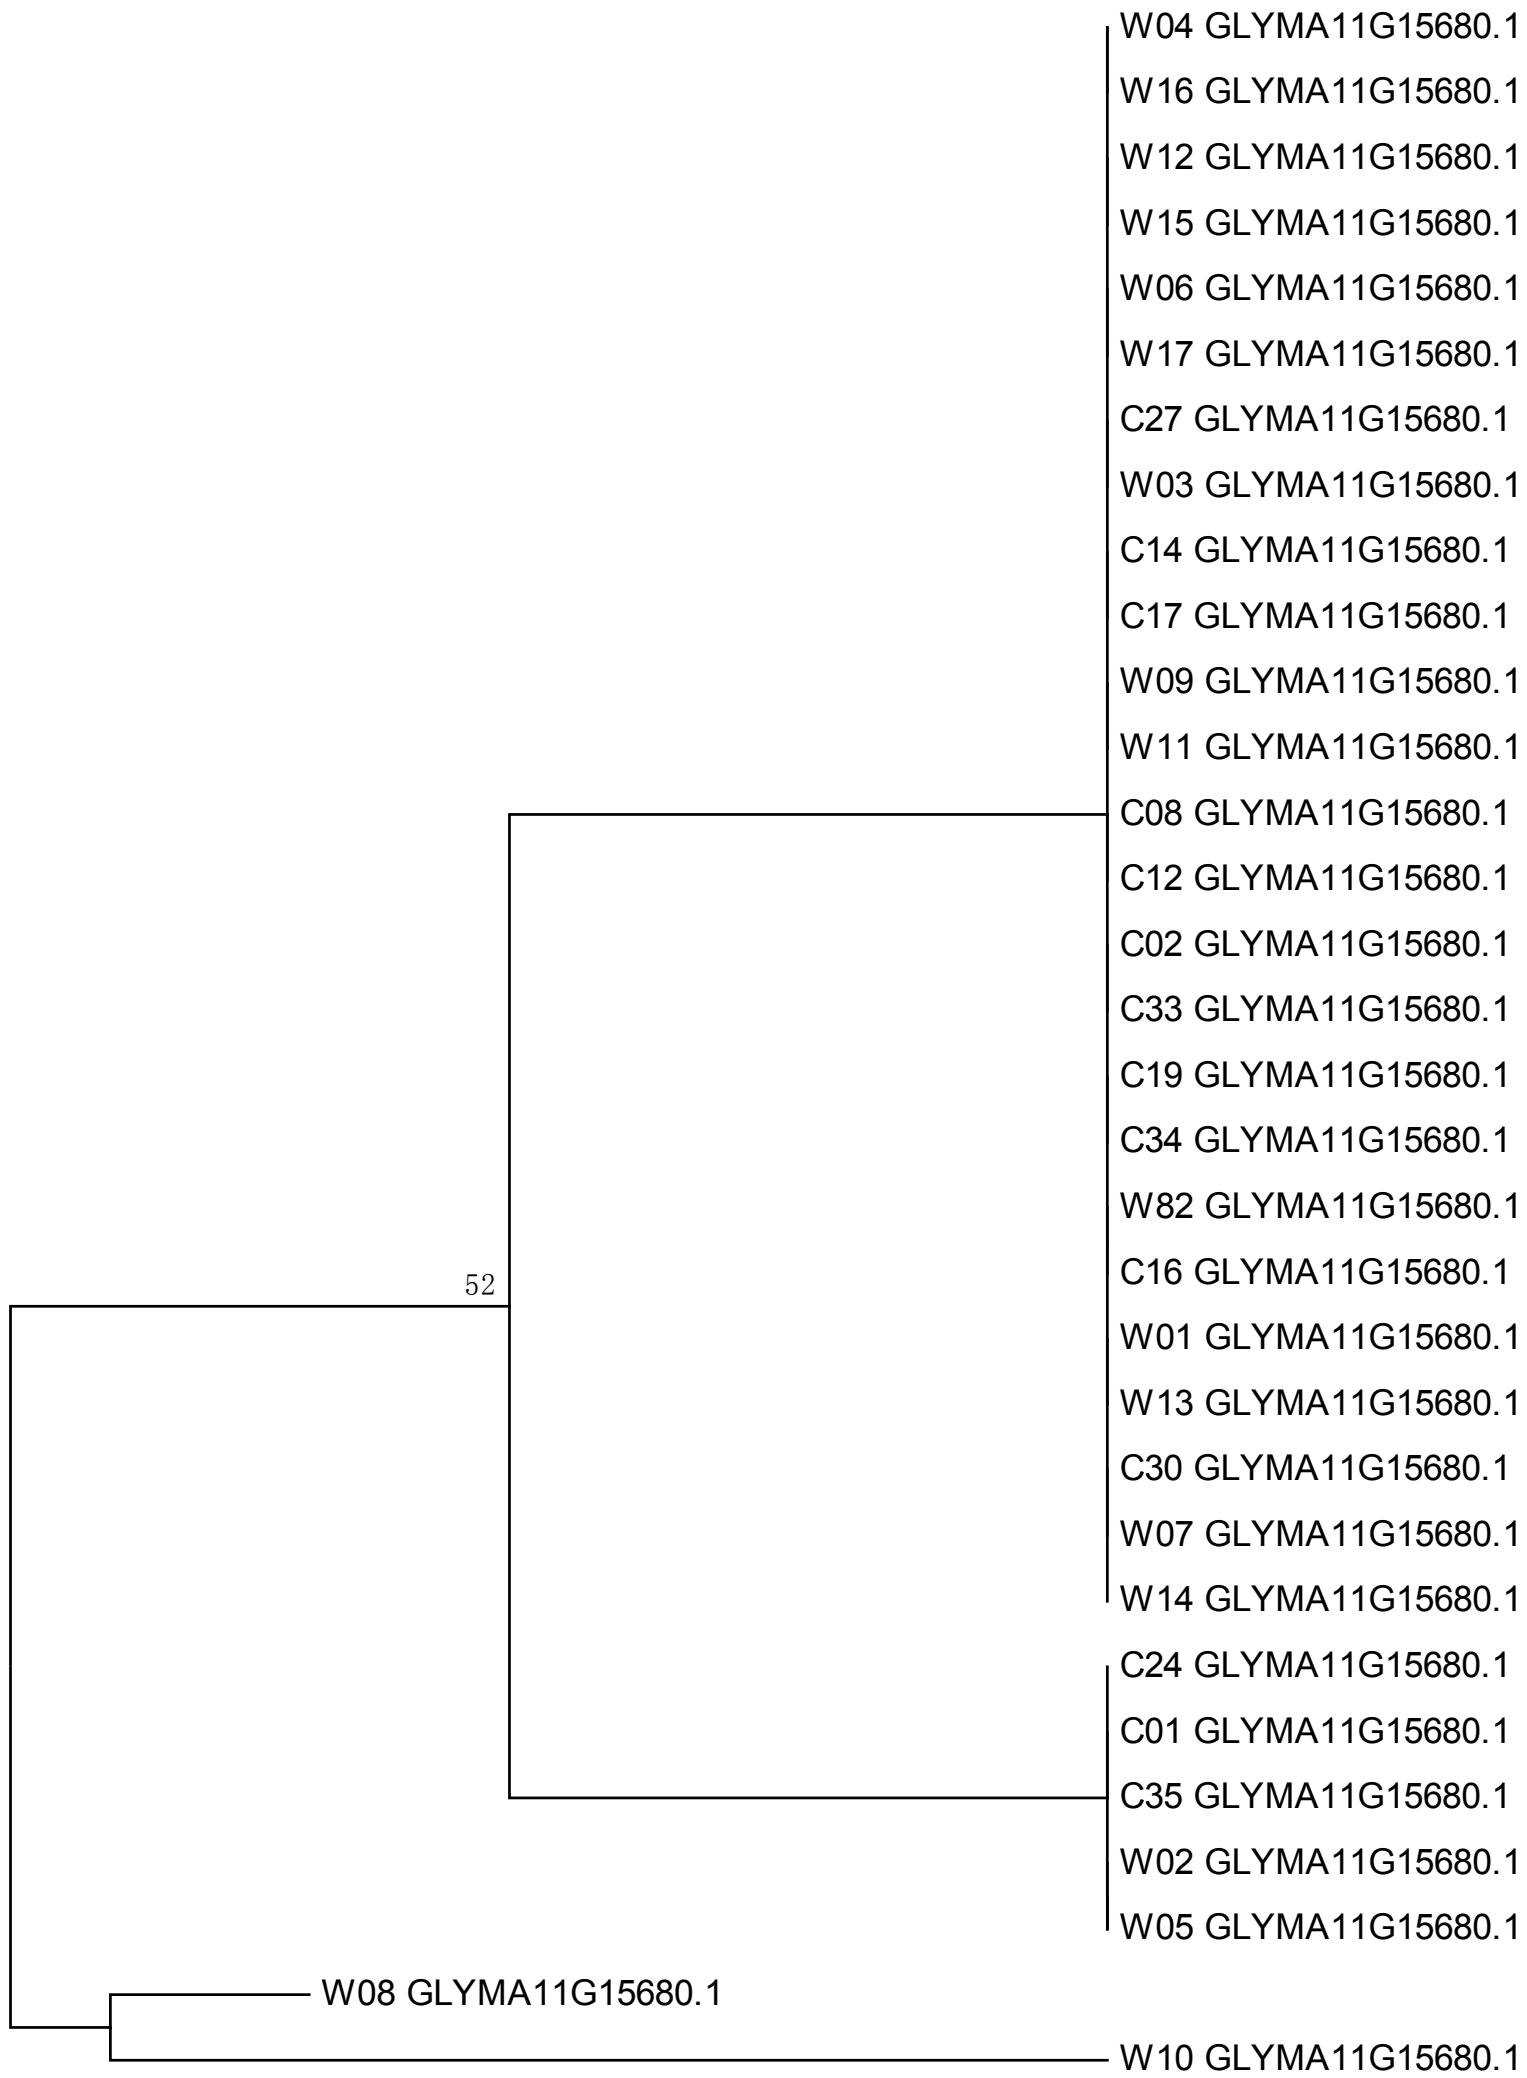

W04 GLYMA11G15680.1  
W16 GLYMA11G15680.1  
W12 GLYMA11G15680.1  
W15 GLYMA11G15680.1  
W06 GLYMA11G15680.1  
W17 GLYMA11G15680.1  
C27 GLYMA11G15680.1  
W03 GLYMA11G15680.1  
C14 GLYMA11G15680.1  
C17 GLYMA11G15680.1  
W09 GLYMA11G15680.1  
W11 GLYMA11G15680.1  
C08 GLYMA11G15680.1  
C12 GLYMA11G15680.1  
C02 GLYMA11G15680.1  
C33 GLYMA11G15680.1  
C19 GLYMA11G15680.1  
C34 GLYMA11G15680.1  
W82 GLYMA11G15680.1  
C16 GLYMA11G15680.1  
W01 GLYMA11G15680.1  
W13 GLYMA11G15680.1  
C30 GLYMA11G15680.1  
W07 GLYMA11G15680.1  
W14 GLYMA11G15680.1  
C24 GLYMA11G15680.1  
C01 GLYMA11G15680.1  
C35 GLYMA11G15680.1  
W02 GLYMA11G15680.1  
W05 GLYMA11G15680.1  
W10 GLYMA11G15680.1

52

W08 GLYMA11G15680.1

0.0001

C01 GLYMA12G16380.1

W09 GLYMA12G16380.1

C27 GLYMA12G16380.1

W12 GLYMA12G16380.1

W82 GLYMA12G16380.1

W11 GLYMA12G16380.1

C02 GLYMA12G16380.1

C16 GLYMA12G16380.1

C08 GLYMA12G16380.1

W15 GLYMA12G16380.1

C12 GLYMA12G16380.1

W10 GLYMA12G16380.1

C33 GLYMA12G16380.1

W04 GLYMA12G16380.1

C14 GLYMA12G16380.1

W02 GLYMA12G16380.1

W07 GLYMA12G16380.1

W16 GLYMA12G16380.1

C30 GLYMA12G16380.1

W01 GLYMA12G16380.1

C24 GLYMA12G16380.1

C34 GLYMA12G16380.1

W06 GLYMA12G16380.1

C35 GLYMA12G16380.1

W03 GLYMA12G16380.1

W17 GLYMA12G16380.1

W05 GLYMA12G16380.1

W08 GLYMA12G16380.1

C17 GLYMA12G16380.1

C19 GLYMA12G16380.1

W13 GLYMA12G16380.1

65 | W14 GLYMA12G16380.1

W13 GLYMA13G24460.

W17 GLYMA13G24460.  
W11 GLYMA13G24460.  
W HC23  
W12 GLYMA13G24460.  
W14 GLYMA13G24460.  
W07 GLYMA13G24460.  
W HC20  
W06 GLYMA13G24460.  
W09 GLYMA13G24460.  
W HC08  
W05 GLYMA13G24460.  
W HC09

W HC10

W04 GLYMA13G24460.  
W03 GLYMA13G24460.  
W HC12  
W02 GLYMA13G24460.  
W16 GLYMA13G24460.  
C HC29  
C HC32  
C HC25  
C HC27  
C HC11  
C HC26  
CW82 GLYMA13G24460  
W01 GLYMA13G24460.  
W HC05  
C27 GLYMA13G24460.  
W10 GLYMA13G24460.

W HC14

C17 GLYMA13G24460.  
C HC31  
C24 GLYMA13G24460.  
C33 GLYMA13G24460.  
C08 GLYMA13G24460.  
C14 GLYMA13G24460.  
C35 GLYMA13G24460.

C16 GLYMA13G24460.  
C HC37  
C HC01  
W HC02  
W08 GLYMA13G24460.  
W HC17

64

C30 GLYMA13G24460.  
C HC04  
C19 GLYMA13G24460.  
W HC03  
C34 GLYMA13G24460.  
C HC28

C12 GLYMA13G24460.  
W15 GLYMA13G24460.  
C01 GLYMA13G24460.  
W HC19

W HC06  
W HC18  
W HC15  
C02 GLYMA13G24460.

65

64

C HC21  
C HC07  
C HC33  
C HC16  
C HC35

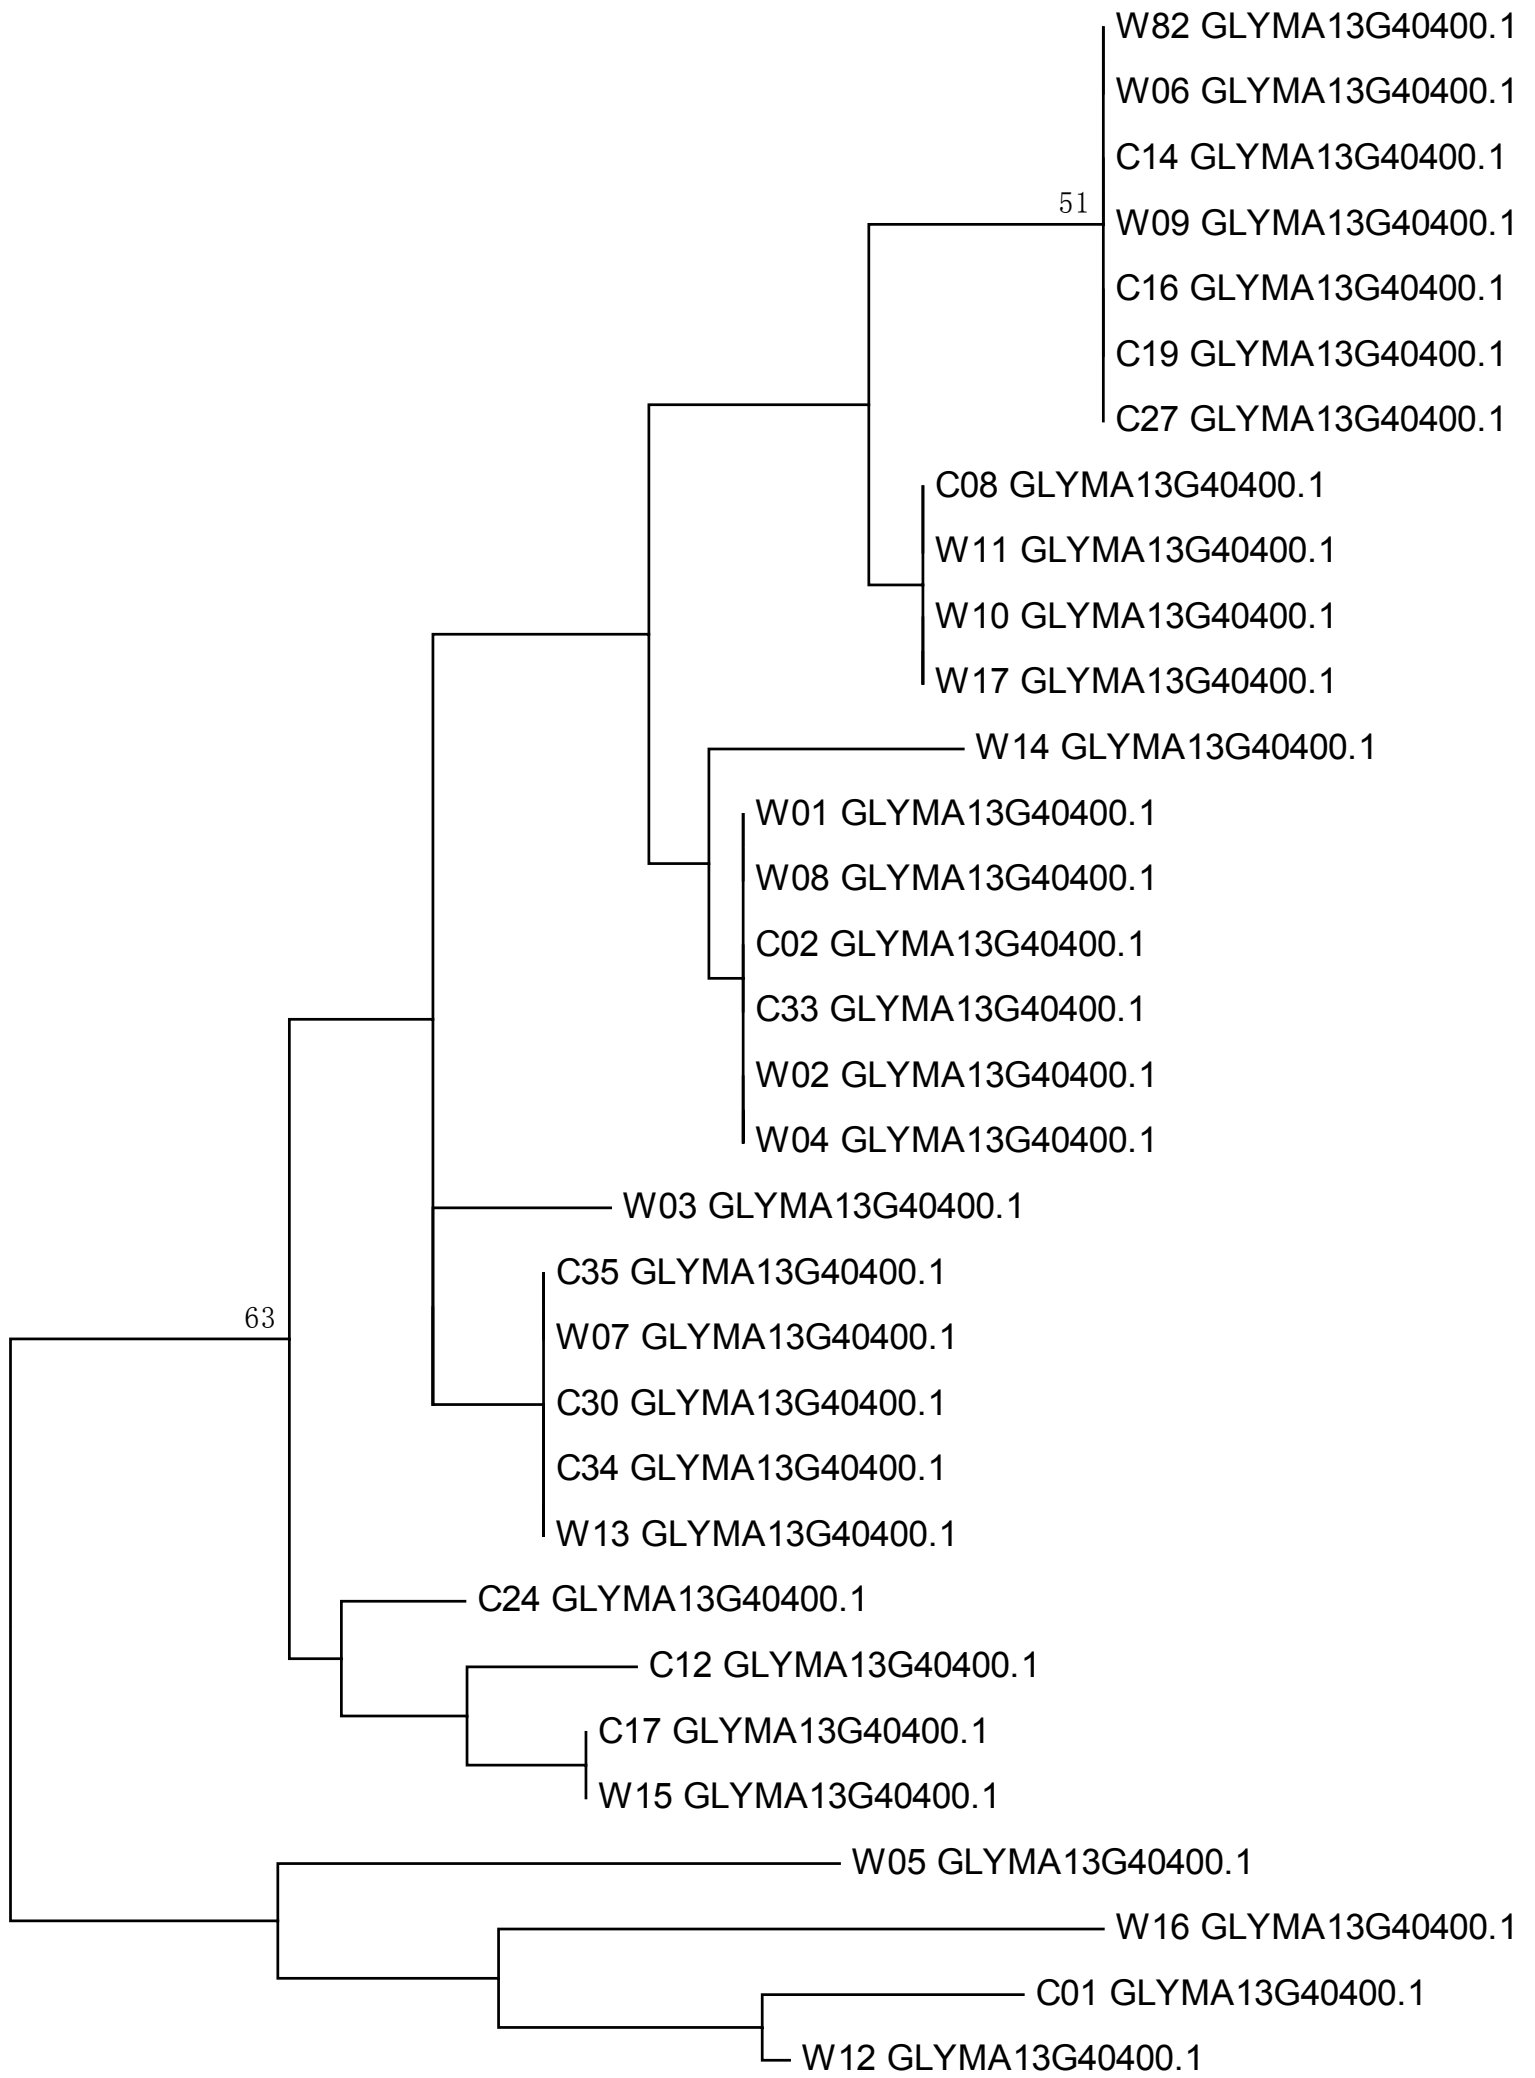

H  
0.0001

C19 GLYMA14G27940.1  
W02 GLYMA14G27940.1  
W03 GLYMA14G27940.1  
W09 GLYMA14G27940.1  
W14 GLYMA14G27940.1  
W17 GLYMA14G27940.1  
W10 GLYMA14G27940.1  
W12 GLYMA14G27940.1  
W13 GLYMA14G27940.1  
W16 GLYMA14G27940.1  
C16 GLYMA14G27940.1  
W15 GLYMA14G27940.1  
C17 GLYMA14G27940.1  
W11 GLYMA14G27940.1  
C08 GLYMA14G27940.1  
C27 GLYMA14G27940.1  
W05 GLYMA14G27940.1  
W08 GLYMA14G27940.1  
C02 GLYMA14G27940.1  
W07 GLYMA14G27940.1  
C14 GLYMA14G27940.1  
W04 GLYMA14G27940.1  
C01 GLYMA14G27940.1  
W06 GLYMA14G27940.1  
C30 GLYMA14G27940.1  
C34 GLYMA14G27940.1  
W82 GLYMA14G27940.1  
W01 GLYMA14G27940.1  
C12 GLYMA14G27940.1  
C24 GLYMA14G27940.1  
C33 GLYMA14G27940.1  
C35 GLYMA14G27940.1

64

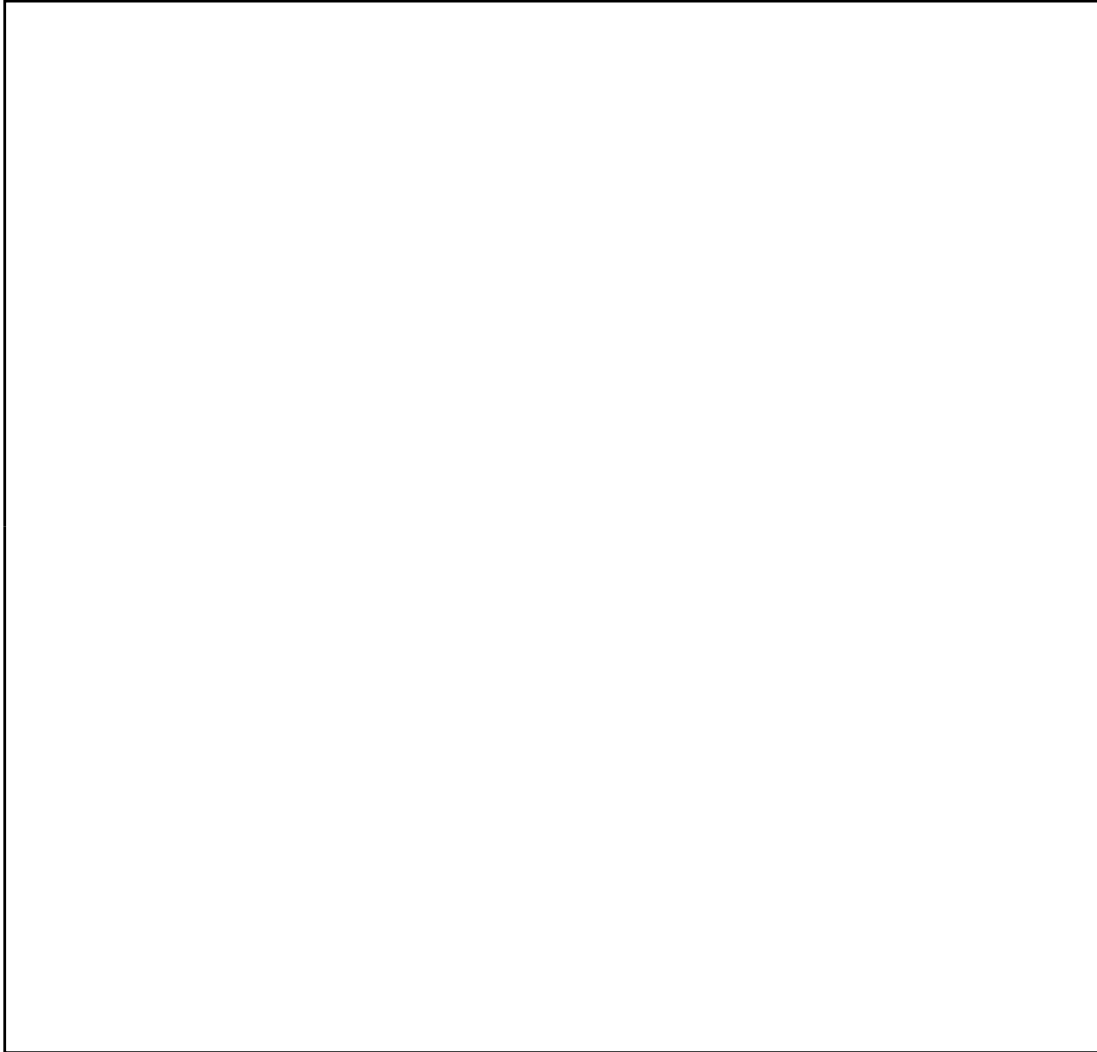

0.0001

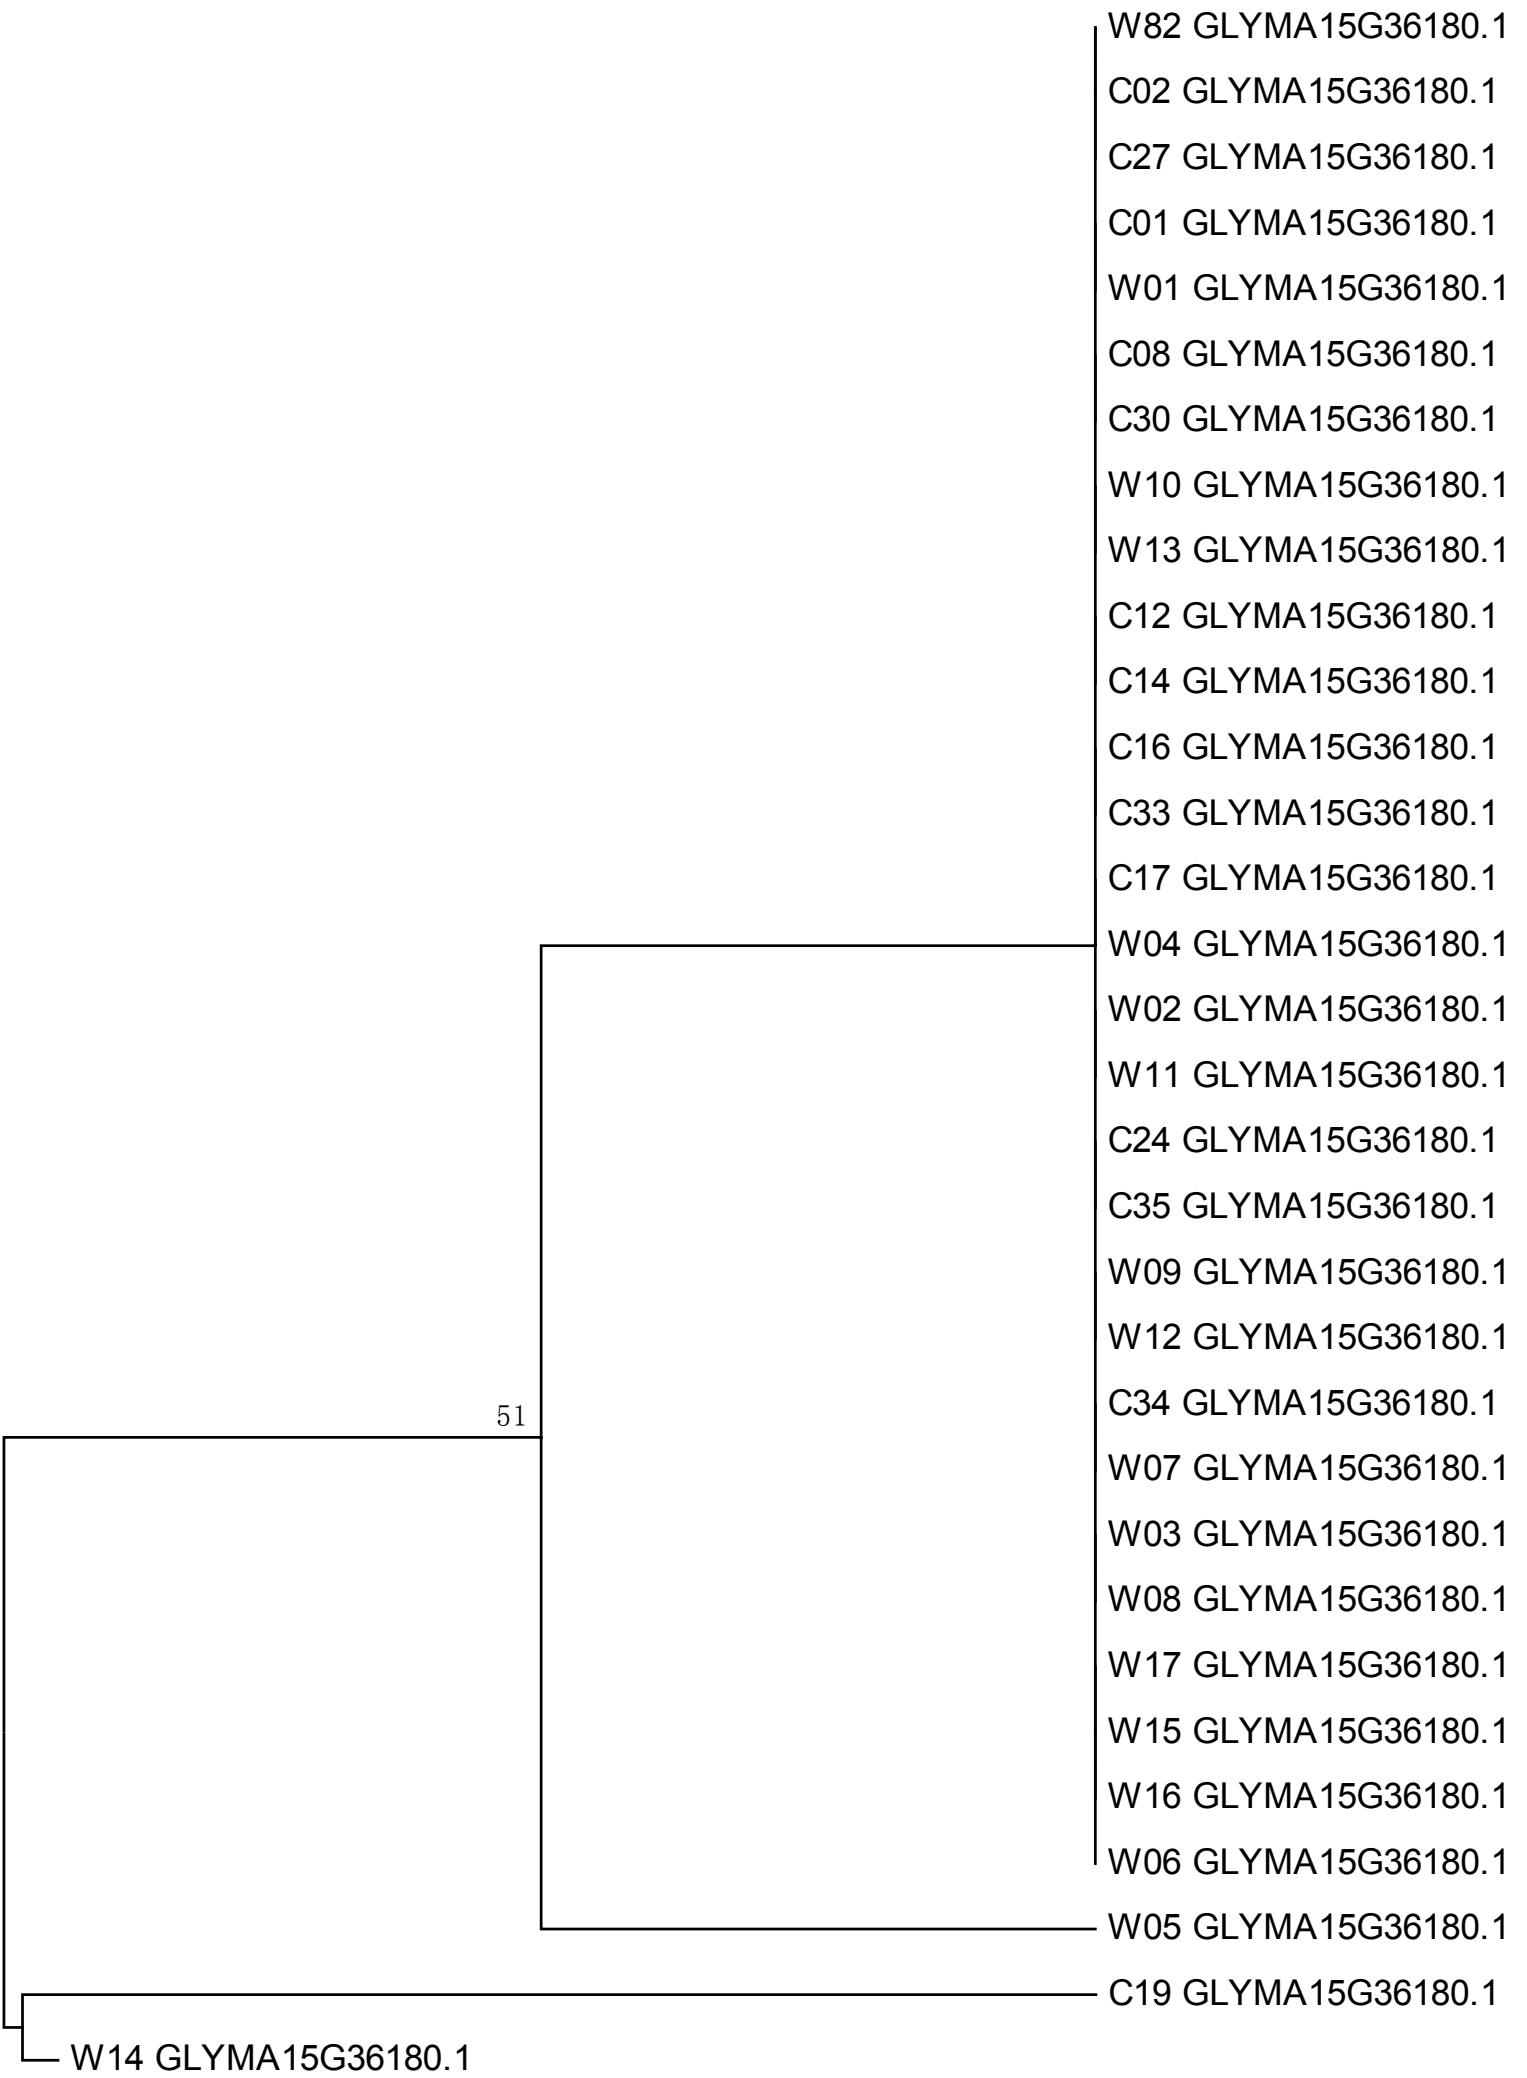

W82 GLYMA15G36180.1

C02 GLYMA15G36180.1

C27 GLYMA15G36180.1

C01 GLYMA15G36180.1

W01 GLYMA15G36180.1

C08 GLYMA15G36180.1

C30 GLYMA15G36180.1

W10 GLYMA15G36180.1

W13 GLYMA15G36180.1

C12 GLYMA15G36180.1

C14 GLYMA15G36180.1

C16 GLYMA15G36180.1

C33 GLYMA15G36180.1

C17 GLYMA15G36180.1

W04 GLYMA15G36180.1

W02 GLYMA15G36180.1

W11 GLYMA15G36180.1

C24 GLYMA15G36180.1

C35 GLYMA15G36180.1

W09 GLYMA15G36180.1

W12 GLYMA15G36180.1

C34 GLYMA15G36180.1

W07 GLYMA15G36180.1

W03 GLYMA15G36180.1

W08 GLYMA15G36180.1

W17 GLYMA15G36180.1

W15 GLYMA15G36180.1

W16 GLYMA15G36180.1

W06 GLYMA15G36180.1

W05 GLYMA15G36180.1

C19 GLYMA15G36180.1

51

W14 GLYMA15G36180.1

0.0001

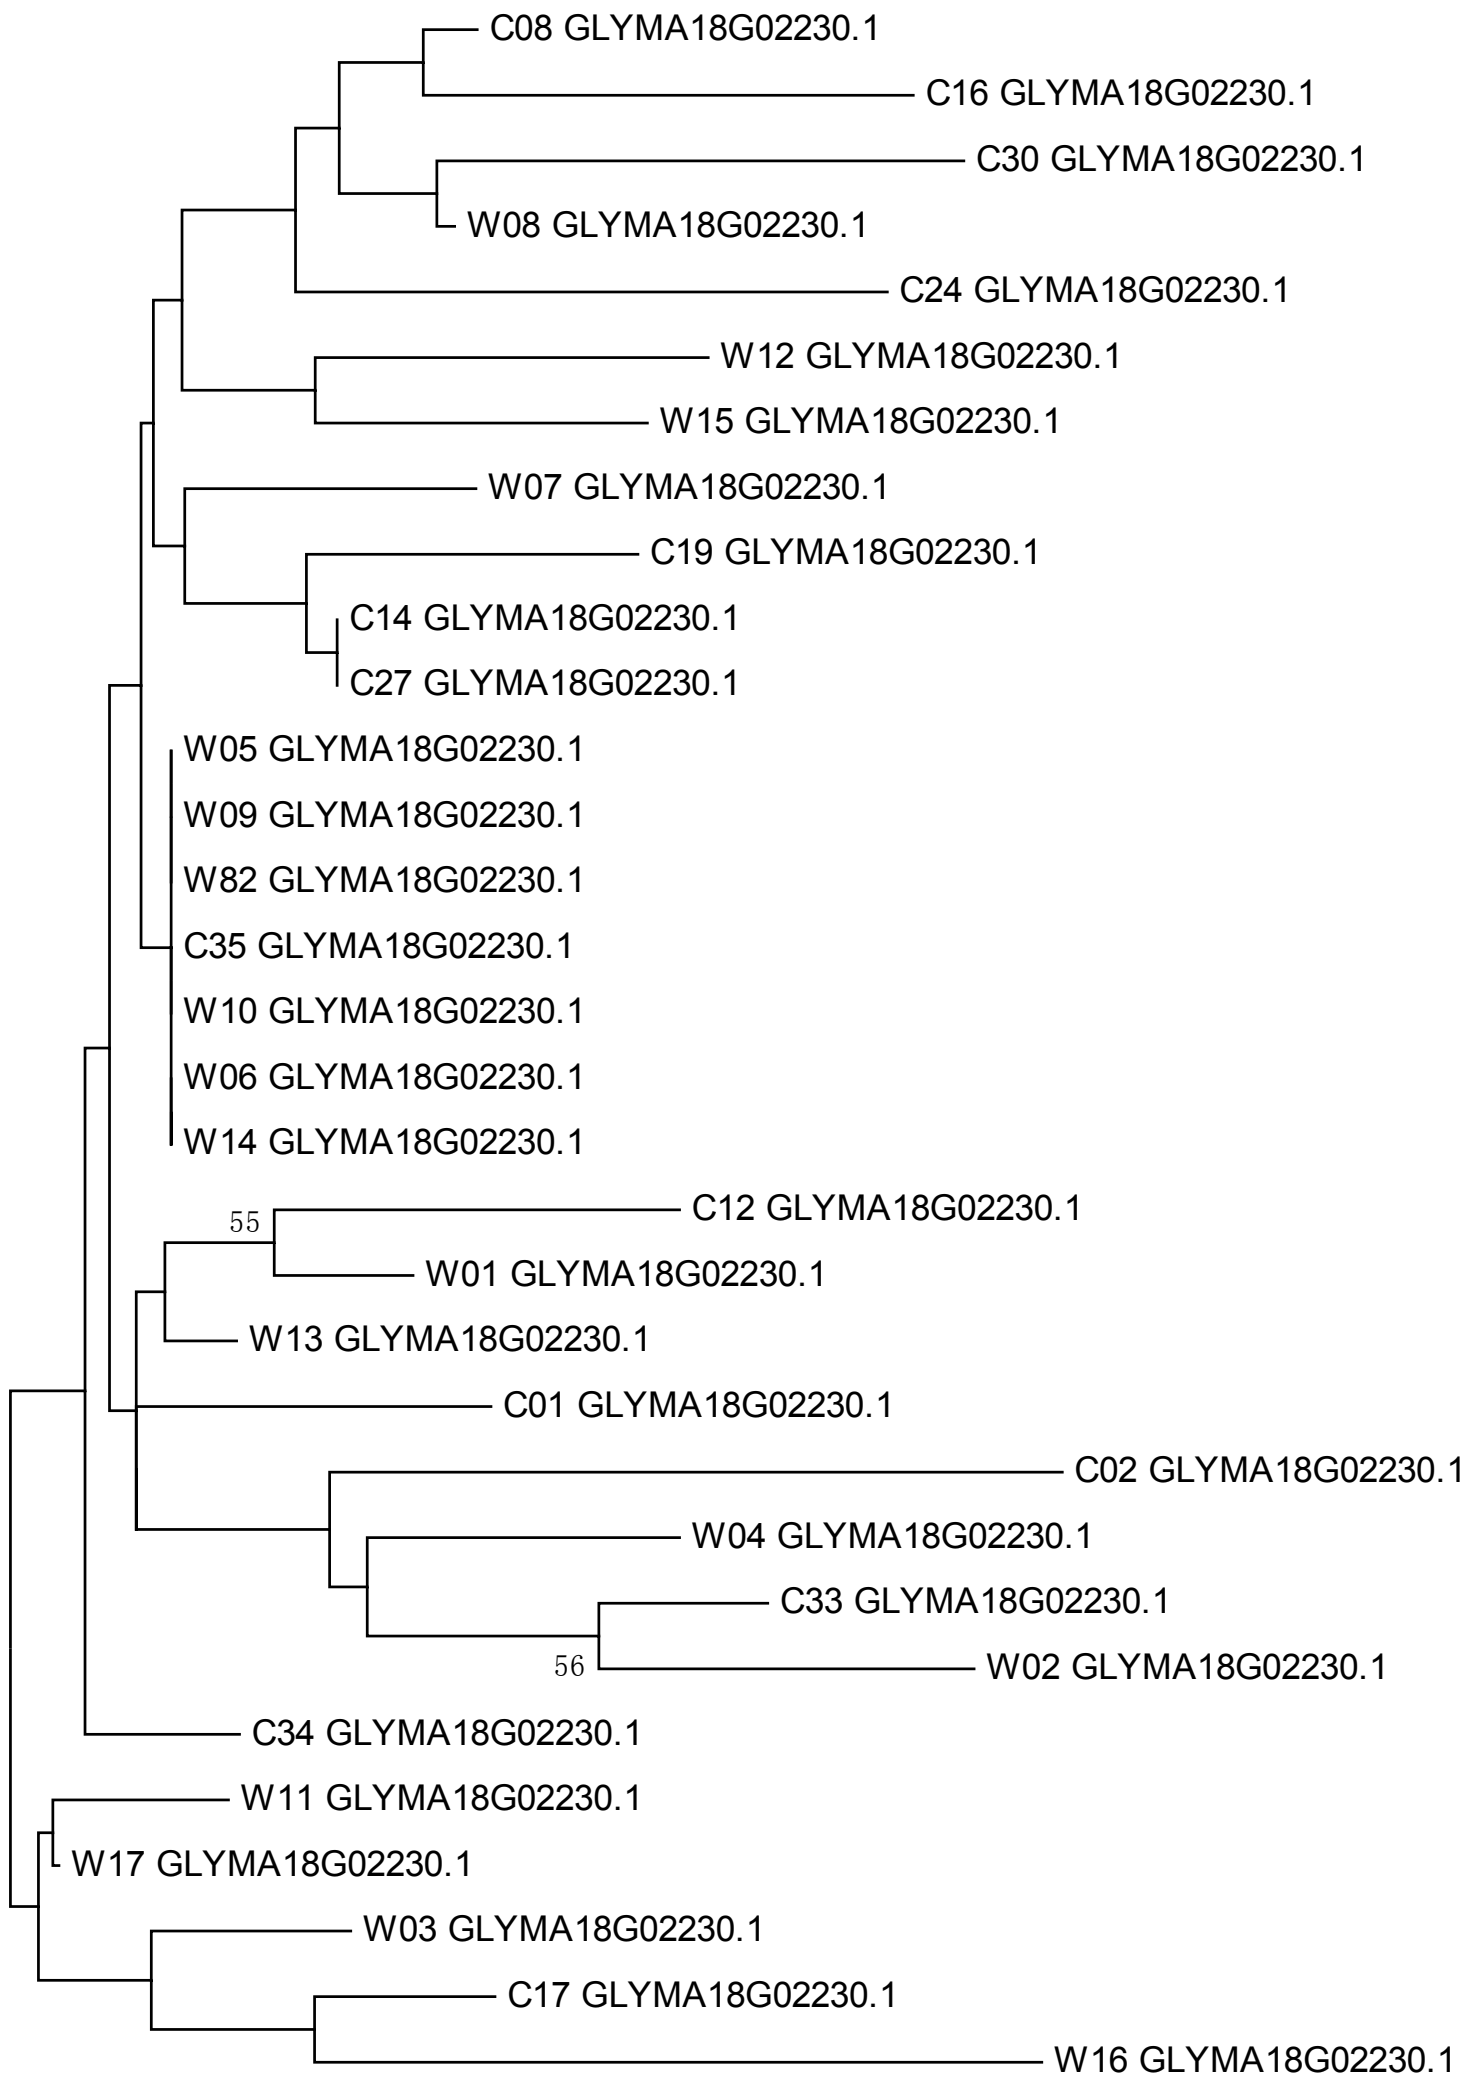

0.0001



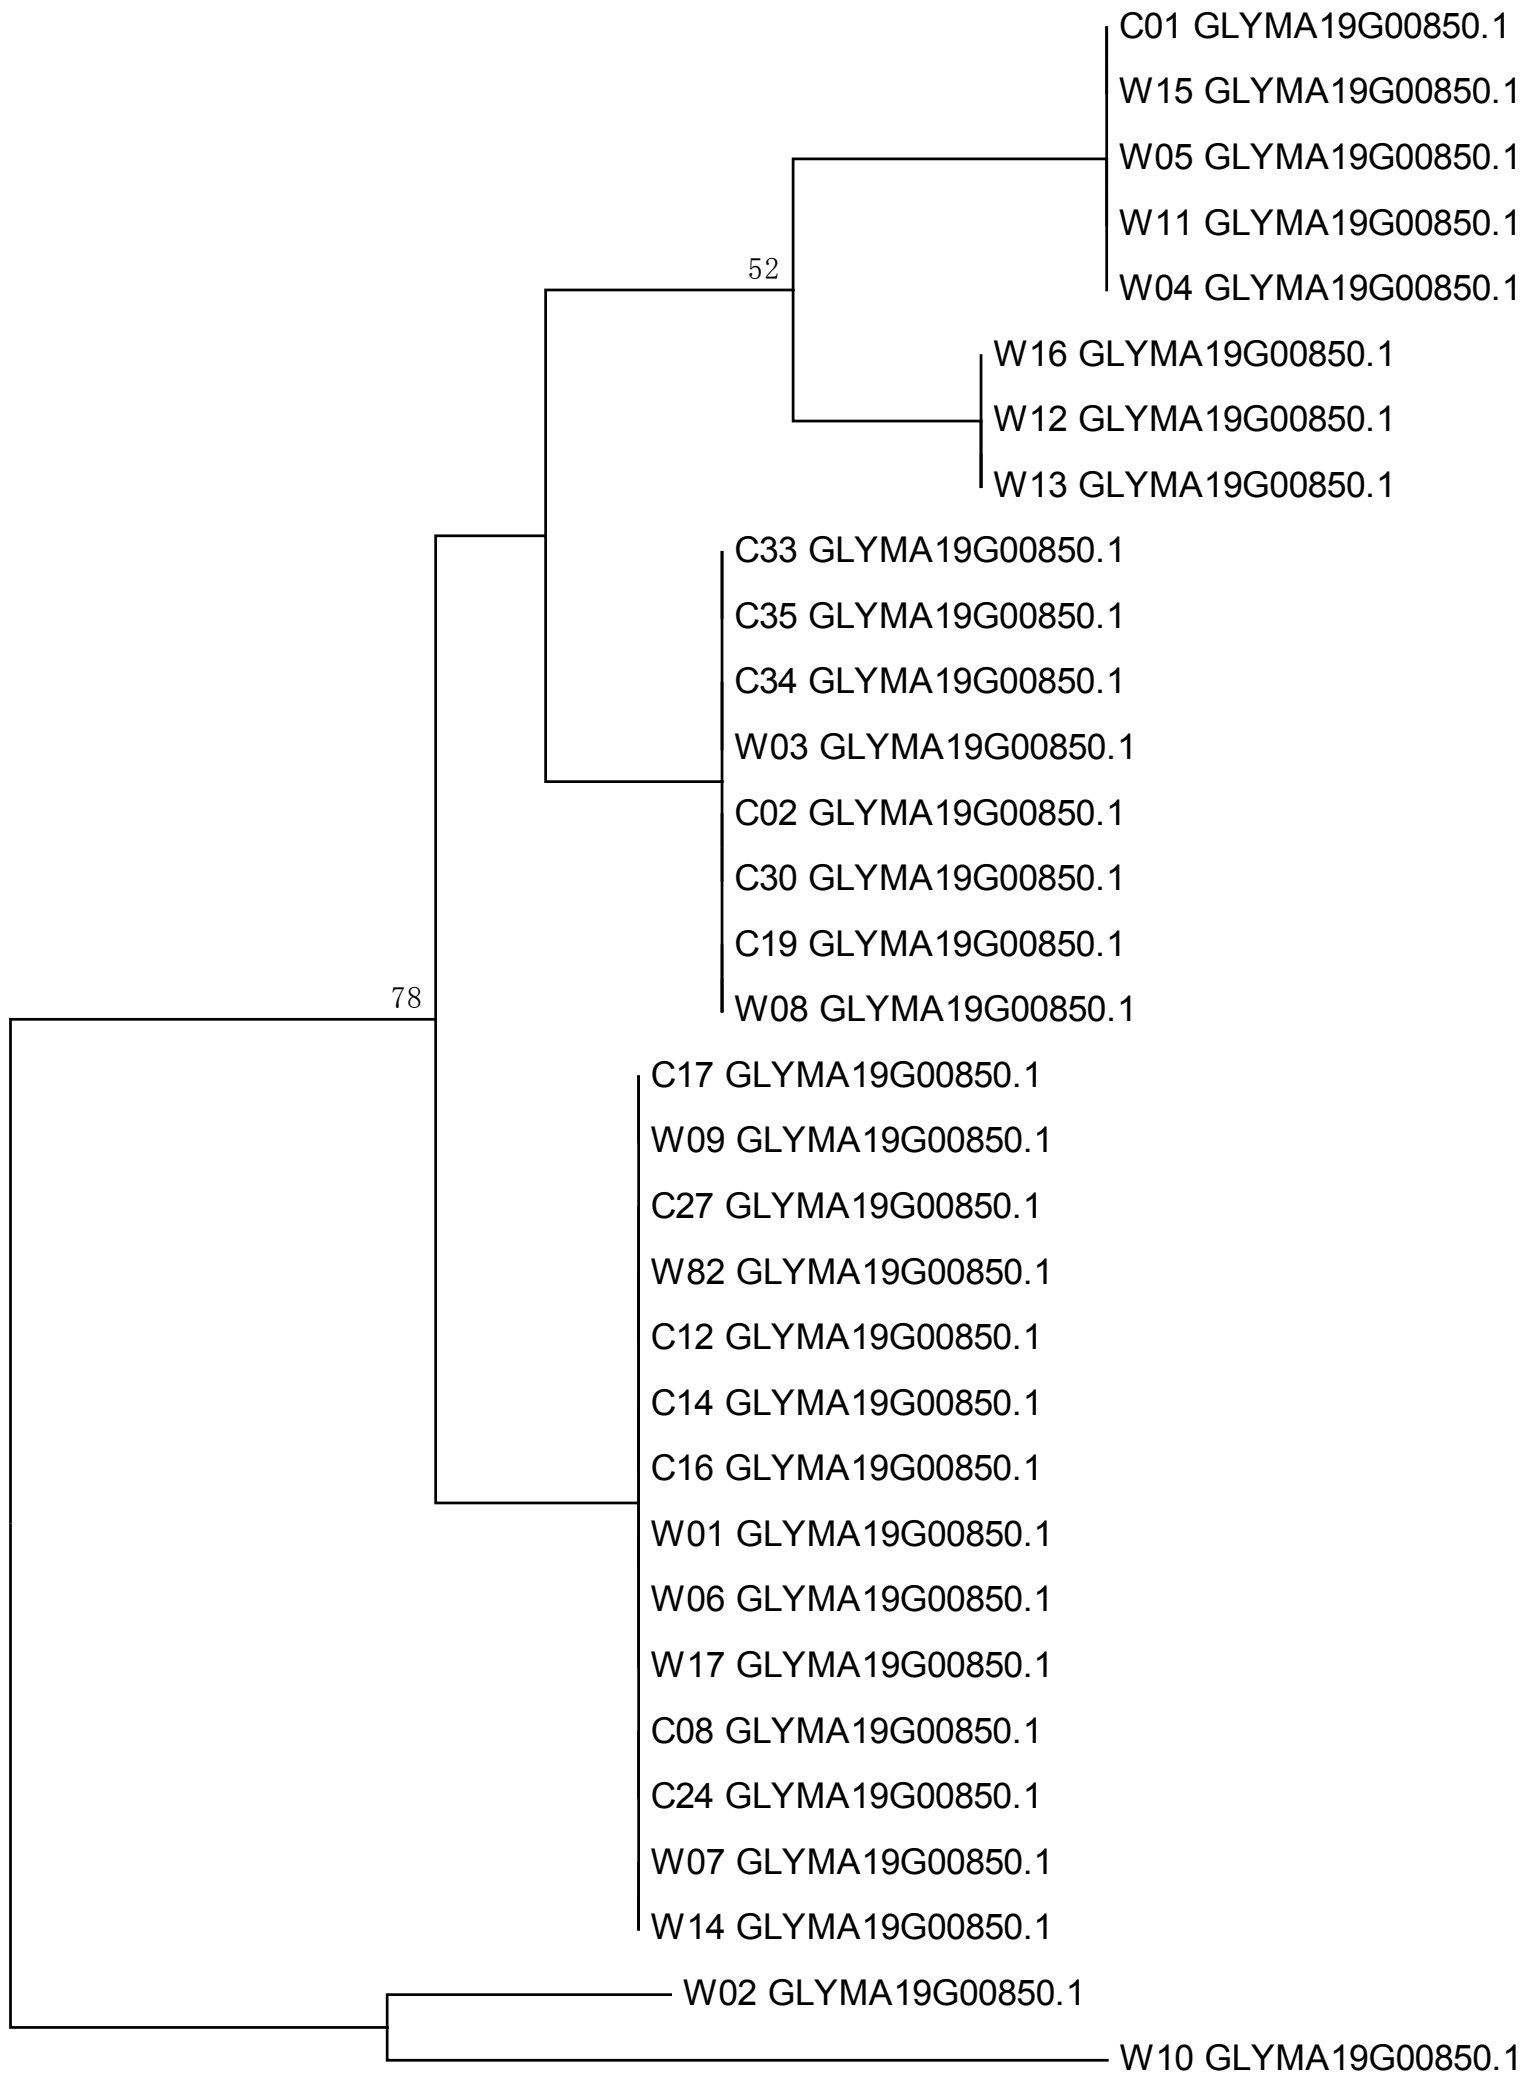

0.0001
